# Supplementary material for: Inhibition of Carbonyl Reductase 1 Enhances Metastasis of Head and Neck Squamous Cell Carcinoma through β-catenin-Mediated Epithelial-Mesenchymal Transition
Source: PubMed Central journal article supplement (PMC6959035; doi:10.7150/jca.34303), 2020-01-01
Supplement: jcav11p0533s1.pdf [file jcav11p0533s1.pdf]

## Supplementary figures and figure legends

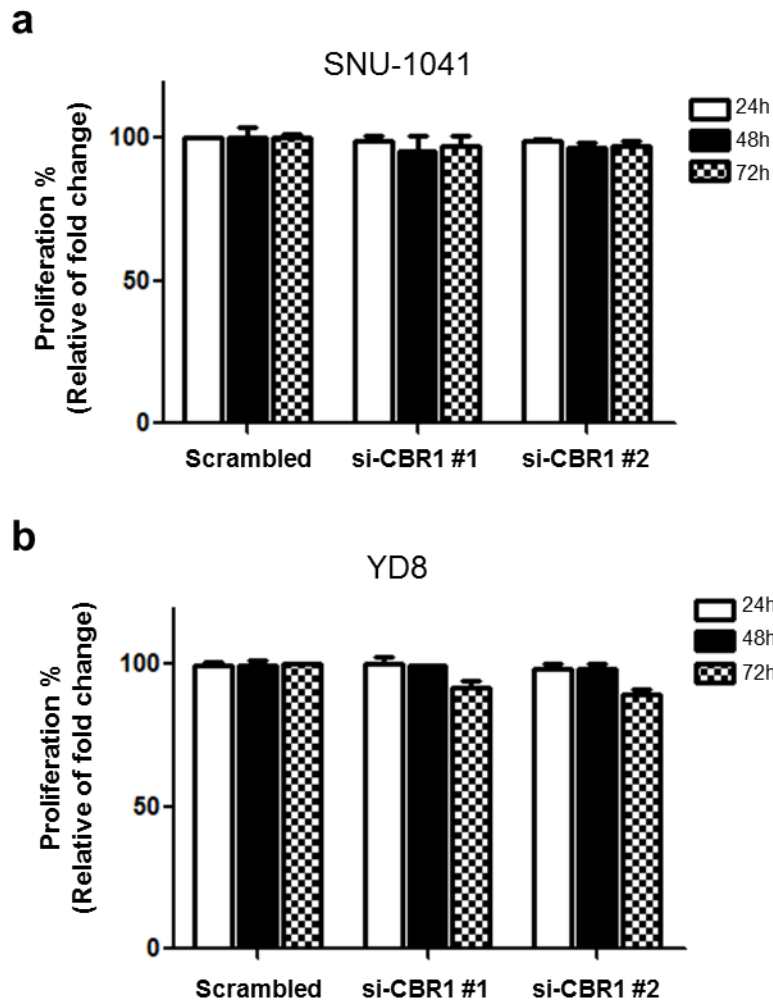

**Supplementary Figure 1. CBR1 depletion does not effect on proliferation of HNSCC cells.** SNU-1041(a) and YD8(b) were transfected with scrambled or *CBR1*-specific siRNA. They were then incubated for indicated time. After incubation, proliferation was assessed using a Cell Counting kit-8. Proliferation rate of CBR1 siRNA-transfected cells were compared with scramble siRNA and presented %. Data are presented as the mean  $\pm$  SD.

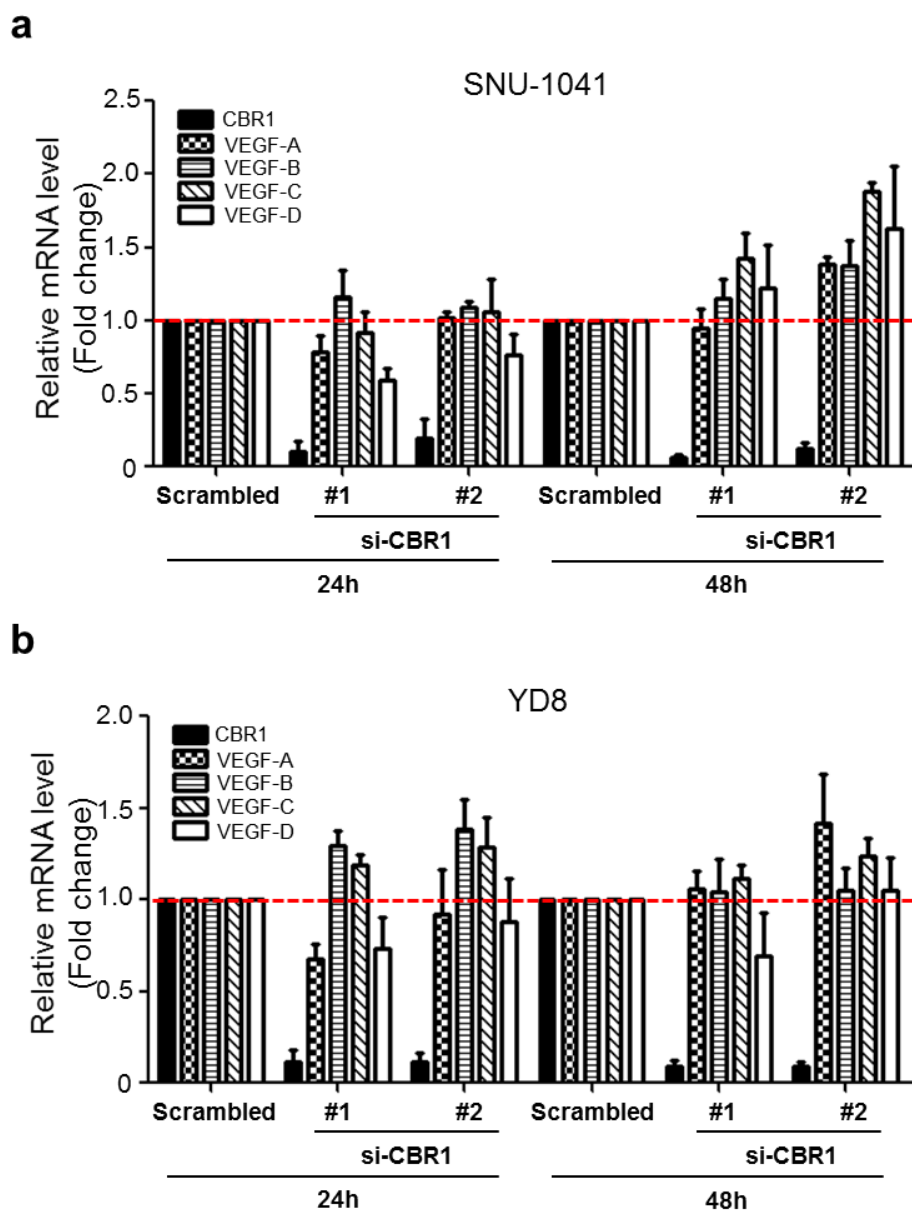

**Supplementary Figure 2. CBR1 depletion is not highly correlated with VEGFs secretion in HNSCC cells.** SNU-1041(a) and YD8(b) were transfected with scrambled or *CBR1*-specific siRNA. At 24 h after siRNA transfection, total RNA was extracted from the indicated cell lines and mRNA expression of VEGF subfamily genes were analyzed by RT-qPCR. GAPDH was used as an internal control to normalize the expression level of each gene. Data are presented as the mean  $\pm$  SD.

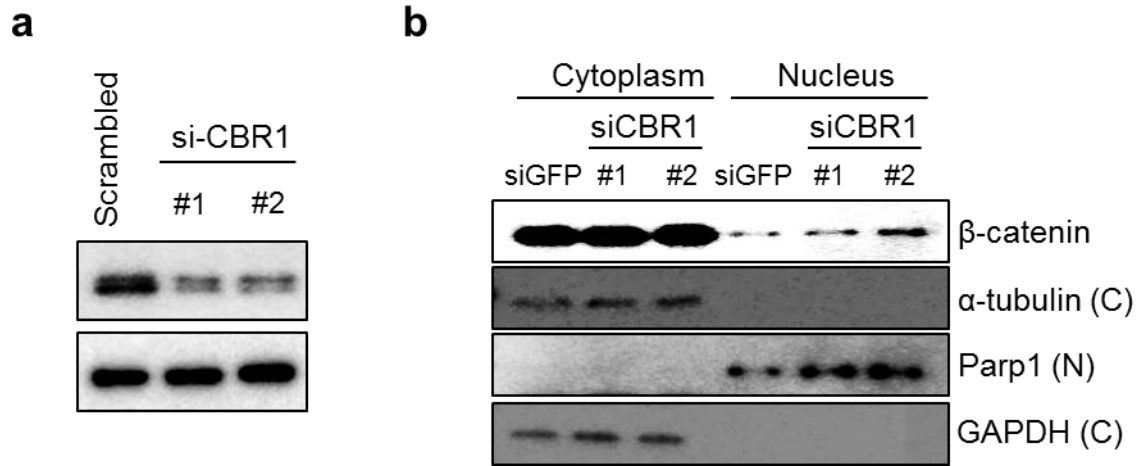

**Supplementary Fig. 3.  $\beta$ -catenin under CBR1 depletion conditions accumulated more in cytoplasm than nuclear.** SNU1041 cells were transfected with scrambled or *CBR1*-specific siRNA for 48 h. a, The CBR1 protein level was evaluated through western blotting analysis in the transfected cells.  $\beta$ -actin was used as an internal loading control. b, subcellular localization of  $\beta$ -catenin was analyzed by immunoblotting after nuclear/cytosol fractionation.  $\alpha$ -tubulin, GAPDH and Parp1 were used as cytoplasmic and nuclear markers, respectively.

## **Supplementary materials and methods**

### **Cell proliferation assay**

Proliferation was assessed using a Cell Counting kit-8 (CCK-8; Dojindo, Tokyo, Japan). Cells were transfected with short interfering RNAs (siRNAs) siControl or siCBR1. Cells were incubated at a density of  $5 \times 10^3$ /well in 96-well culture plates (Costar, Cambridge, MA, USA) at 37 °C for 3 days, and every 24 h, each well of the cultured cells was incubated with 10  $\mu$ l of Cell Counting kit-8 solution for 2 h at 37 °C. The absorbance was measured at 450 nm using an enzyme-linked immunosorbent assay reader (Molecular Devices, San Jose, CA, USA). The results are presented as percentages, relative to control cells.

### **Quantitative real-time PCR analysis**

Total RNA was extracted from the indicated cell lines using an RNeasy mini kit (Qiagen, Hilden, Germany) according to the manufacturer's instructions. The RNA concentration was quantified using a NanoDrop spectrophotometer. Total RNA (500 ng) was reverse transcribed to cDNA using a qPCRBIO cDNA Synthesis kit (PCRBIOSYSTEMS, London, UK). The resulting cDNA was assayed by using quantitative real-time quantitative RT-PCR with 2 $\times$  qPCRBIO SyberGreen Mix (PCRBIOSYSTEMS). Real-time RT-PCR was performed using the Step One Plus real-time RT-PCR system with a 96-well block module (Applied Biosystems, Foster City, CA, USA). The CBR1 primers were as follows: sense 5'-CAGAGACCCCTGTGTACTTG-3'; antisense 5'-CAACTCAGGACAAGG TACAAAATG-3'. The vascular endothelial growth factor A (VEGF-A) primers were as follows: sense 5'-CTACCTCCACCATGC CAAGT-3'; antisense 5'-CACACAGGATGGCTTGAAGA-3'. The VEGF-B primers were as follows: sense 5'-CCCTTGACTGTGGAGCTCAT-3'; antisense 5'-ACATCTCCCCCAGCT GACT-3'. The VEGF-C primers were as follows: sense 5'-

AGAGAACAGGCCAACCTCAA-3'; antisense 5'-GTTTGTCGCGACTCCAAACT-3'. The VEGF-D primers were as follows: sense 5'-AGGTTTGCGGCAACTTTCTA-3'; antisense 5'-ATCGGAACACGTTTCACACAA-3'. Cycling conditions were 95 °C for 10 minutes, followed by 40 cycles of 95 °C for 15 seconds and 60 °C for 60 seconds. Relative amounts of mRNA were calculated from the threshold cycle number using expression of *GAPDH* (glyceraldehyde-3-phosphate dehydrogenase) as an endogenous control. All experiments were performed in triplicate and the values were averaged.

### **Nuclear/Cytosol Fractionation**

After transfection, all cells were rinsed with ice-cold phosphate-buffered saline (PBS) and harvested using a cell scraper, followed by centrifugation. The cell pellets were used for nuclear/cytosol fractionation. The nuclear/cytosol extraction was prepared using an NE-PER Nuclear Cytoplasmic Extraction Reagent kit (Pierce, Rockford, IL, USA) according to the manufacturer's instruction.
